# Supplementary material
Source: PubMed Central journal article supplement (PMC7550502)
Supplement: 13197_2020_4482_MOESM1_ESM.pdf [file 13197_2020_4482_MOESM1_ESM.pdf]

## SUPPLEMENTARY MATERIAL

**Table 1.** Some semiempirical kinetic models used to fit the experimental data of *Sarcocornia perennis* drying process.

| Model             | Equation                                 |
|-------------------|------------------------------------------|
| Lewis/Newton      | $MR = \exp(-kt)$                         |
| Page              | $MR = \exp(-kt^n)$                       |
| Modified Page     | $MR = \exp[-(kt)^n]$                     |
| Henderson & Pabis | $MR = A \exp(-kt)$                       |
| Logarithmic       | $MR = A \exp(-kt) + B$                   |
| Two-terms         | $MR = A \exp(-k_0t) + B \exp(-k_1t)$     |
| Wang & Singh      | $MR = 1 + k_0t + k_1t^2$                 |
| Verma             | $MR = A \exp(-k_0t) + (1-A) \exp(-k_1t)$ |
| Vega-Lemus        | $MR = (a + kt)^2$                        |

**Table 2.** Model parameters and values of statistical coefficients for the drying process of *Sarcocornia perennis* at 40 °C, 50 °C, 60 °C and 70 °C and air velocity of 1.1 m/s.

| Experiment           | 40 °C                          | 50 °C                          | 60 °C                          | 70 °C                          |
|----------------------|--------------------------------|--------------------------------|--------------------------------|--------------------------------|
| <b>Lewis/Newton</b>  |                                |                                |                                |                                |
| k (± sd)             | 0.0018±1.8325x10 <sup>-5</sup> | 0.0044±6.5937x10 <sup>-5</sup> | 0.0071± 0.0001                 | 0.0107± 0.0002                 |
| <b>R<sup>2</sup></b> | 0.9581                         | 0.9647                         | 0.9719                         | 0.9653                         |
| <b>MAE</b>           | 0.0578009                      | 0.05170                        | 0.01440                        | 0.05355                        |
| <b>RMSE</b>          | 0.0630958                      | 0.05708                        | 0.05114                        | 0.05794                        |
| <b>SSE</b>           | 0.0039811                      | 0.00326                        | 0.00261                        | 0.00336                        |
| <b>SE</b>            | 0.0029877                      | 0.00438                        | 0.00452                        | 0.00648                        |
| <b>χ<sup>2</sup></b> | 0.0039900                      | 0.00328                        | 0.00266                        | 0.00344                        |
| <b>Page</b>          |                                |                                |                                |                                |
| k (± sd)             | 0.0001±5.1054x10 <sup>-6</sup> | 0.0005±2.2806x10 <sup>-5</sup> | 0.0011±4.8826x10 <sup>-5</sup> | 0.0016±0.0001                  |
| n (± sd)             | 1.4403±0.0077                  | 1.3973±0.0084                  | 1.3590±0.0085                  | 1.4065±0.0143                  |
| <b>R<sup>2</sup></b> | 0.9950                         | 0.9970                         | 0.9962                         | 0.9965                         |
| <b>MAE</b>           | 0.0193101                      | 0.0113835                      | 0.0029663                      | 0.0138891                      |
| <b>RMSE</b>          | 0.0196612                      | 0.0135938                      | 0.0119249                      | 0.0157106                      |
| <b>SSE</b>           | 0.0003982                      | 0.0001825                      | 0.0001583                      | 0.0002954                      |
| <b>SE</b>            | 0.0008996                      | 0.0010079                      | 0.0012110                      | 0.0016925                      |
| <b>χ<sup>2</sup></b> | 0.0003528                      | 0.0001950                      | 0.0001393                      | 0.0002804                      |
| <b>Modified Page</b> |                                |                                |                                |                                |
| k (± sd)             | 0.0017±4.1950x10 <sup>-6</sup> | 0.0043±1.2083x10 <sup>-5</sup> | 0.0068±2.0958x10 <sup>-5</sup> | 0.0102±5.0151x10 <sup>-5</sup> |
| n (± sd)             | 1.4403±0.0077                  | 1.3973±0.0084                  | 1.3589±0.0086                  | 1.4069±0.0146                  |
| <b>R<sup>2</sup></b> | 0.9962                         | 0.9980                         | 0.9984                         | 0.9973                         |
| <b>MAE</b>           | 0.0163136                      | 0.0112135                      | 0.0026663                      | 0.0132803                      |
| <b>RMSE</b>          | 0.0186618                      | 0.0131340                      | 0.0113249                      | 0.0147214                      |
| <b>SSE</b>           | 0.0003483                      | 0.0001725                      | 0.0001283                      | 0.0002235                      |
| <b>SE</b>            | 0.0008837                      | 0.0010073                      | 0.0010010                      | 0.0016512                      |

|                              |                                      |                                      |                      |                       |
|------------------------------|--------------------------------------|--------------------------------------|----------------------|-----------------------|
| $\chi^2$                     | 0.0003498                            | 0.0001745                            | 0.0001303            | 0.0002205             |
| <b>Henderson &amp; Pabis</b> |                                      |                                      |                      |                       |
| A ( $\pm$ sd)                | 1.1215 $\pm$ 0.0084                  | 1.1141 $\pm$ 0.0116                  | 1.1154 $\pm$ 0.0124  | 1.1201 $\pm$ 0.0178   |
| k ( $\pm$ sd)                | 0.0020 $\pm$ 2.1979 $\times 10^{-5}$ | 0.0049 $\pm$ 7.6251 $\times 10^{-5}$ | 0.0079 $\pm$ 0.0001  | 0.0119 $\pm$ 0.0003   |
| <b>R<sup>2</sup></b>         | 0.9725                               | 0.9784                               | 0.9840               | 0.9789                |
| <b>MAE</b>                   | 0.0462657                            | 0.0396308                            | 0.0087983            | 0.0408456             |
| <b>RMSE</b>                  | 0.0511149                            | 0.0446349                            | 0.0385643            | 0.0452275             |
| <b>SSE</b>                   | 0.0026127                            | 0.0019923                            | 0.0014872            | 0.0020455             |
| <b>SE</b>                    | 0.0024204                            | 0.0034233                            | 0.0034085            | 0.0050562             |
| $\chi^2$                     | 0.0026245                            | 0.0020157                            | 0.0015104            | 0.0020967             |
| <b>Logarithmic</b>           |                                      |                                      |                      |                       |
| A ( $\pm$ sd)                | 1.3019 $\pm$ 0.0072                  | 1.2828 $\pm$ 0.0104                  | 1.1896 $\pm$ 0.0073  | 1.2333 $\pm$ 0.0112   |
| k ( $\pm$ sd)                | 0.0012 $\pm$ 1.7989 $\times 10^{-5}$ | 0.0031 $\pm$ 6.7479 $\times 10^{-5}$ | 0.0059 $\pm$ 0.0001  | 0.0082 $\pm$ 0.0002   |
| B ( $\pm$ sd)                | -0.2541 $\pm$ 0.0087                 | -0.2340 $\pm$ 0.0125                 | -0.1252 $\pm$ 0.0082 | -0.1728 $\pm$ 0.0133  |
| <b>R<sup>2</sup></b>         | 0.9944                               | 0.9954                               | 0.9952               | 0.9960                |
| <b>MAE</b>                   | 0.0184074                            | 0.0159114                            | 0.0042713            | 0.0168613             |
| <b>RMSE</b>                  | 0.0208713                            | 0.0182830                            | 0.0188954            | 0.0196593             |
| <b>SSE</b>                   | 0.0004356                            | 0.0003343                            | 0.0003570            | 0.0003865             |
| <b>SE</b>                    | 0.0009883                            | 0.0014022                            | 0.0016701            | 0.0021978             |
| $\chi^2$                     | 0.0004385                            | 0.0003402                            | 0.0003655            | 0.0004012             |
| <b>Two terms</b>             |                                      |                                      |                      |                       |
| A ( $\pm$ sd)                | 0.5606 $\pm$ 432714.9                | 0.5570 $\pm$ 257828.3                | 0.5576 $\pm$ 5296.7  | 0.5600 $\pm$ 323904.4 |
| k <sub>0</sub> ( $\pm$ sd)   | 0.0020 $\pm$ 3.1008                  | 0.0050 $\pm$ 13.1757                 | 0.0078 $\pm$ 9.0726  | 0.0120 $\pm$ 37.7305  |
| B ( $\pm$ sd)                | 0.5606 $\pm$ 432714.9                | 0.5570 $\pm$ 257828.3                | 0.5575 $\pm$ 85296.7 | 0.5600 $\pm$ 323904.4 |
| k <sub>1</sub> ( $\pm$ sd)   | 0.0020 $\pm$ 3.0892                  | 0.0049 $\pm$ 13.0155                 | 0.0079 $\pm$ 9.2377  | 0.0119 $\pm$ 37.2672  |
| <b>R<sup>2</sup></b>         | 0.9725                               | 0.9784                               | 0.9840               | 0.9789                |
| <b>MAE</b>                   | 0.0462724                            | 0.0396413                            | 0.0087798            | 0.0408505             |
| <b>RMSE</b>                  | 0.0511151                            | 0.0446353                            | 0.0385714            | 0.0452295             |
| <b>SSE</b>                   | 0.0026128                            | 0.0019923                            | 0.0014878            | 0.0020457             |
| <b>SE</b>                    | 0.0024204                            | 0.0034233                            | 0.0034092            | 0.0050564             |
| $\chi^2$                     | 0.0026363                            | 0.0020397                            | 0.0015350            | 0.0021506             |

| <b>Wang &amp; Singh</b>    |                                                  |                                                   |                                                   |                                                   |
|----------------------------|--------------------------------------------------|---------------------------------------------------|---------------------------------------------------|---------------------------------------------------|
| $k_0$ ( $\pm$ sd)          | $-0.0013 \pm 3.1058 \times 10^{-6}$              | $-0.0033 \pm 1.2303 \times 10^{-5}$               | $-0.0051 \pm 1.3675 \times 10^{-5}$               | $-0.0077 \pm 3.2213 \times 10^{-5}$               |
| $k_1$ ( $\pm$ sd)          | $4.0725 \times 10^{-7} \pm 26880 \times 10^{-9}$ | $2.6560 \times 10^{-6} \pm 2.7784 \times 10^{-8}$ | $6.6606 \times 10^{-6} \pm 4.0899 \times 10^{-8}$ | $1.4986 \times 10^{-5} \pm 1.5309 \times 10^{-7}$ |
| <b>R<sup>2</sup></b>       | 0.9949                                           | 0.9961                                            | 0.9965                                            | 0.9967                                            |
| <b>MAE</b>                 | 0.0201830                                        | 0.0219124                                         | 0.0337541                                         | 0.0196208                                         |
| <b>RMSE</b>                | 0.0231136                                        | 0.0242146                                         | 0.0226201                                         | 0.0192613                                         |
| <b>SSE</b>                 | 0.0005992                                        | 0.0001796                                         | 0.0001525                                         | 0.0025268                                         |
| <b>SE</b>                  | 0.0009683                                        | 0.0019935                                         | 0.0014503                                         | 0.0018590                                         |
| <b><math>\chi^2</math></b> | 0.0004901                                        | 0.0001967                                         | 0.0001640                                         | 0.0002900                                         |
| <b>Verma</b>               |                                                  |                                                   |                                                   |                                                   |
| A ( $\pm$ sd)              | 151932 $\pm$ 2731266                             | 99372 $\pm$ 93.7718                               | 9.2749 $\pm$ 80.7380)                             | 8.6848 $\pm$ 94.7940                              |
| $k_0$ ( $\pm$ sd)          | 00034 $\pm$ 00018                                | 0.0083 $\pm$ 0.0035                               | 0.0127 $\pm$ 0.0051                               | 0.0196 $\pm$ 0.0111                               |
| $k_1$ ( $\pm$ sd)          | 0.0036 $\pm$ 0.0021                              | 0.0090 $\pm$ 0.0043                               | 0.0140 $\pm$ 0.0065                               | 0.0218 $\pm$ 0.0144                               |
| <b>R<sup>2</sup></b>       | 0.9943                                           | 0.9965                                            | 0.9969                                            | 0.9960                                            |
| <b>MAE</b>                 | 0.0210813                                        | 0.0145668                                         | 0.0023136                                         | 0.0169520                                         |
| <b>RMSE</b>                | 0.0233068                                        | 0.0164524                                         | 0.0140566                                         | 0.0187244                                         |
| <b>SSE</b>                 | 0.0005432                                        | 0.0002707                                         | 0.0001976                                         | 0.0003506                                         |
| <b>SE</b>                  | 0.0011036                                        | 0.0012618                                         | 0.0012424                                         | 0.0020933                                         |
| <b><math>\chi^2</math></b> | 0.0005469                                        | 0.0002755                                         | 0.0002023                                         | 0.0003639                                         |
|                            |                                                  |                                                   |                                                   |                                                   |
| <b>Veja-Lemus</b>          |                                                  |                                                   |                                                   |                                                   |
| A ( $\pm$ sd)              | $-0.0007 \pm 1.4325 \times 10^{-6}$              | $-0.0017 \pm 5.1859 \times 10^{-6}$               | $-0.0026 \pm 9.1898 \times 10^{-6}$               | $-0.0040 \pm 1.1645 \times 10^{-5}$               |
| k ( $\pm$ sd)              | 1.0150 $\pm$ 0.0007                              | 1.0125 $\pm$ 0.0010                               | 1.0091 $\pm$ 0.0011                               | 1.0137 $\pm$ 0.0009                               |
| <b>R<sup>2</sup></b>       | 0.9942                                           | 0.9972                                            | 0.9975                                            | 0.9965                                            |
| <b>MAE</b>                 | 0.0282020                                        | 0.0152606                                         | 0.0029928                                         | 0.0146789                                         |
| <b>RMSE</b>                | 0.0193737                                        | 0.0155024                                         | 0.0147808                                         | 0.0168611                                         |
| <b>SSE</b>                 | 0.00039076                                       | 0.00020903                                        | 0.0001671                                         | 0.000344                                          |
| <b>SE</b>                  | 0.0009912                                        | 0.0017288                                         | 0.0015761                                         | 0.0017552                                         |
| <b><math>\chi^2</math></b> | 0.0004081                                        | 0.0001914                                         | 0.0001783                                         | 0.0002752                                         |
